# Supplementary material for: Gene expression based inference of cancer drug sensitivity
Source: PubMed Central journal article supplement (PMC9515171; doi:10.1038/s41467-022-33291-z), 2022-09-27
Supplement: 41467_2022_33291_MOESM2_ESM.pdf [file 41467_2022_33291_MOESM2_ESM.pdf]

## **Description of Additional Supplementary Files**

File name: **Supplementary Data 1**

Description: Performance evaluation of AutoML models. Performance was determined using AUC-PR, AUC and F1 scores.

File name: **Supplementary Data 2**

Description: Result of predictions for BRCA tumor-drug pairs. This file also includes information on patients' overall survival, groups used for survival analysis and observed clinical responses.
